# Supplementary material for: High-Output Wearable Flow Ring-Based Triboelectric Nanogenerator via Opposite Charging Intermediate Layer
Source: Hindawi journal article supplement (doi:10.1155/2023/3415211), 2023-02-13
Supplement: f1 [file 3415211.f1.pdf]

# **High-output wearable flow ring-based triboelectric nanogenerator via opposite charging intermediate layer**

Seh-Hoon Chung<sup>1,†</sup>, Yu Ha Jang<sup>1,†</sup>, Dongchang Kim<sup>1</sup>, Joon-seok Lee<sup>1</sup>, Sunghan Kim<sup>1</sup>, Joong Yull Park<sup>1</sup>, Jinkee Hong<sup>2,\*</sup>, and Sangmin Lee<sup>1,\*</sup>

<sup>1</sup> School of Mechanical Engineering, Chung-ang University,  
84, Heukseok-ro, Dongjak-gu, Seoul, Republic of Korea

<sup>2</sup> Department of Chemical & Biomolecular Engineering, College of Engineering, Yonsei University, 50 Yonsei-ro, Seodaemun-gu, Seoul 03722, South Korea

<sup>†</sup> These authors contributed equally to this work

\* E-mail: [slee98@cau.ac.kr](mailto:slee98@cau.ac.kr)

\*E-mail: [jinkee.hong@yonsei.ac.kr](mailto:jinkee.hong@yonsei.ac.kr)

## Supplementary Information

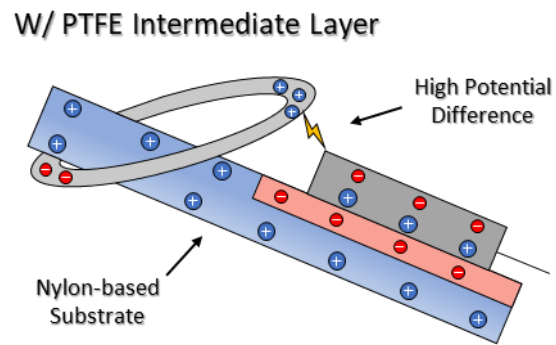

**Supplementary Information 1** | Schematic illustration of FR-TENG with nylon-based substrate and PTFE patterned layer

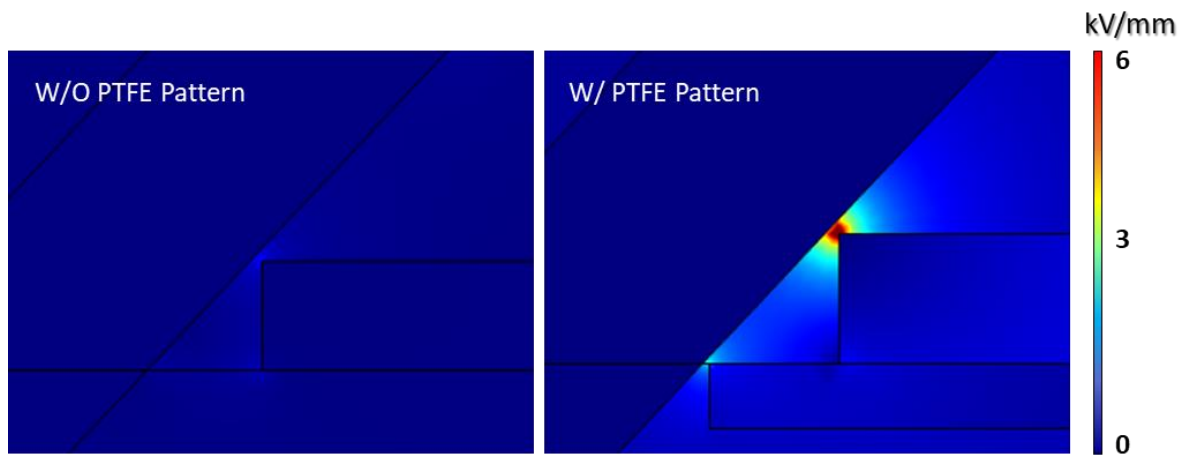

**Supplementary Information 2** | Simulation result of FR-TENG without and with PTFE pattern

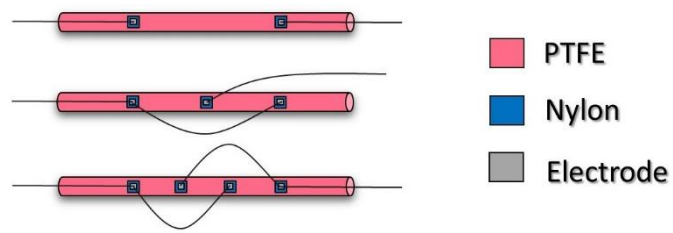

**Supplementary Information 3** | Schematic illustration of FR-TENG with different dielectric film and electrode number

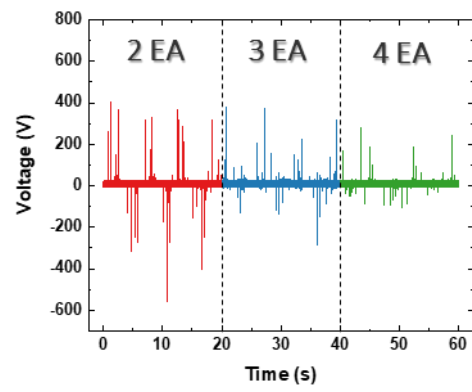

**Supplementary Information 4** |  $V_{oc}$  output of FR-TENG with different dielectric film and electrode number

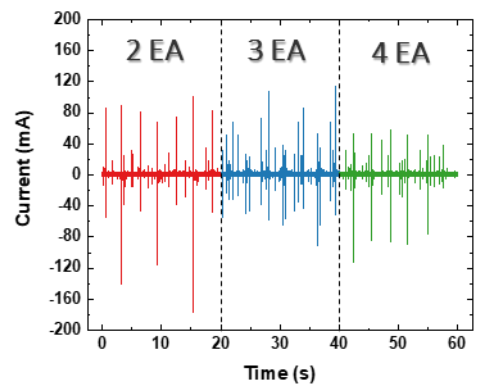

**Supplementary Information 5** |  $I_{CC}$  output of FR-TENG with different dielectric film and electrode number

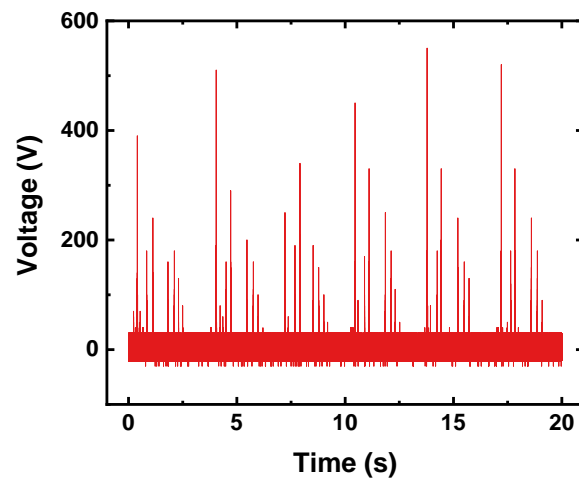

**Supplementary Information 6** |  $V_{oc}$  graph of rectified sleeve-type FR-TENG

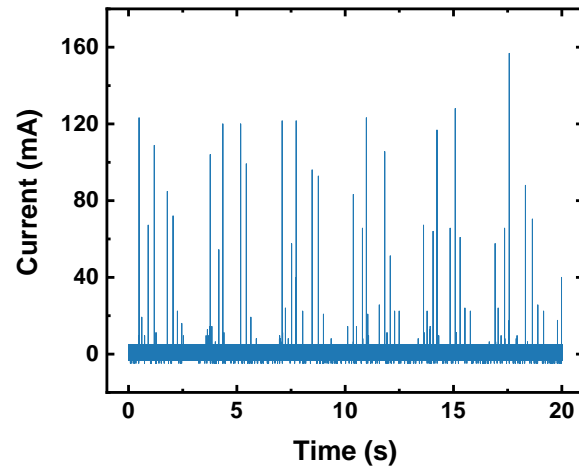

**Supplementary Information 7** |  $I_{CC}$  graph of rectified sleeve-type FR-TENG



**Supplementary Video 1|**

<https://www.dropbox.com/s/vsv1y4cxdvoahaay/Supplementary%20Video%201.mp4?dl=0>
